# Supplementary material for: Long‐term ferrocyanide application via deicing salts promotes the establishment of Actinomycetales assimilating ferrocyanide‐derived carbon in soil
Source: PubMed Central journal article supplement (PMC4919992; doi:10.1111/1751-7915.12362), 2016-05-19

**Fig. S3** (Supporting Information)

Phylogenetic dendrogram (maximum likelihood consensus tree) showing the distribution of sequences related to Actinobacteria derived from soil D, F and W at day 32 after ferrocyanide application. OTUs representing bacteria assimilating ferrocyanide-derived C are highlighted in grey.

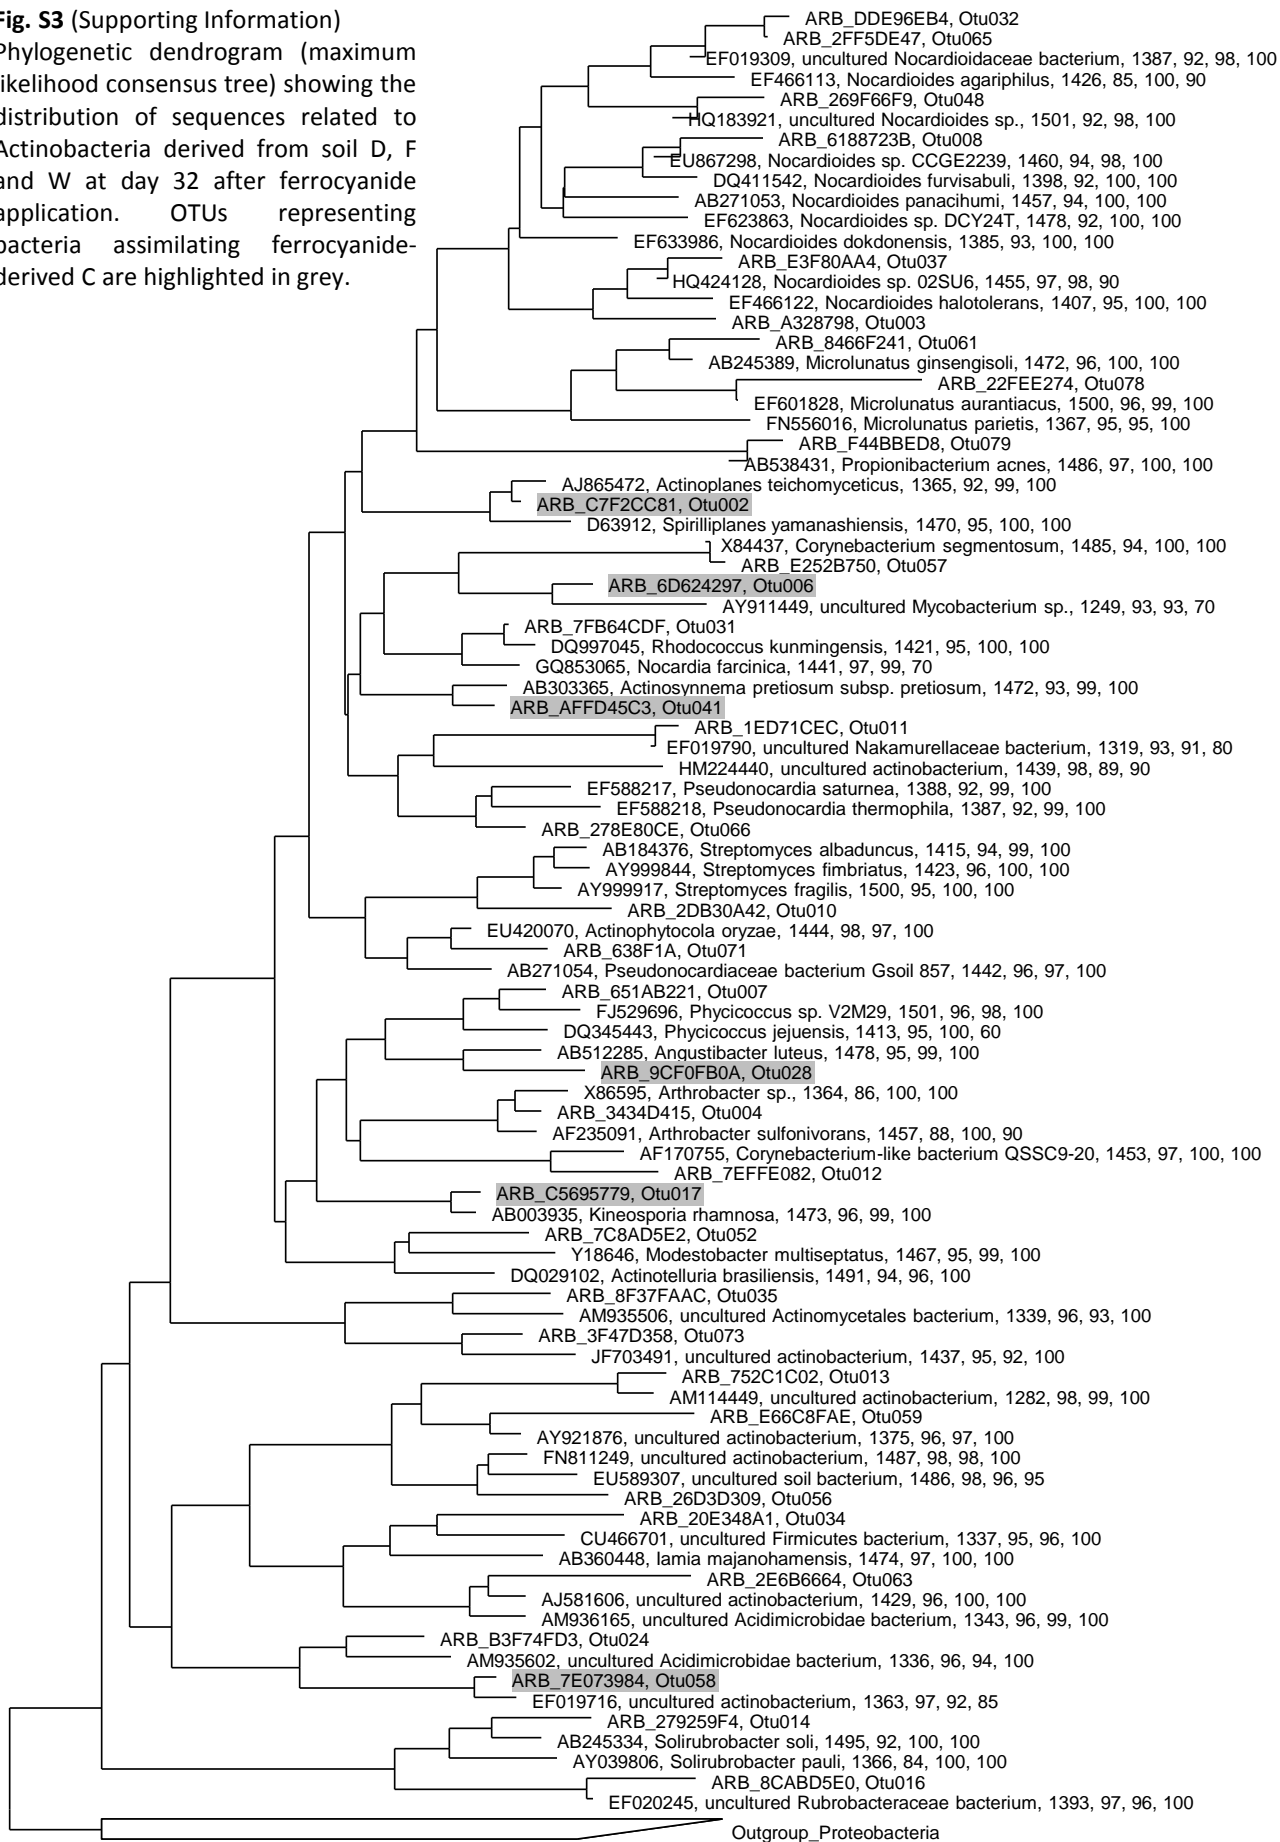

Supplement: MBT2-9-502-s003.pdf [file MBT2-9-502-s003.pdf]
