# Supplementary material for: Long‐term ferrocyanide application via deicing salts promotes the establishment of Actinomycetales assimilating ferrocyanide‐derived carbon in soil
Source: PubMed Central journal article supplement (PMC4919992; doi:10.1111/1751-7915.12362), 2016-05-19
Supplement: MBT2-9-502-s004.pdf [file MBT2-9-502-s004.pdf]

Table S1

Relative abundance (%) of TRFLP fragments obtained from the reconstructed TRFLP profile by summarized gradient fractions from soil D, F and W based on partial 16S rRNA gene sequences after DNA extraction and PCR amplification. TRFs which are <sup>13</sup>C-labelled are highlighted in grey.

| TRF  | D     | F     | W     |
|------|-------|-------|-------|
| B53  | 1.65  | 2.58  | 0.37  |
| B56  | 39.06 | 33.36 | 19.07 |
| B60  | 2.13  | 2.60  | 1.42  |
| B64  | 1.59  | 3.10  | 1.40  |
| B69  | 1.80  | 3.37  | 1.05  |
| B73  | 1.58  | 2.60  | 0.88  |
| B77  | 2.56  | 2.54  | 0.98  |
| B82  | 3.49  | 2.85  | 2.16  |
| B86  | 1.07  | 0.95  | 0.63  |
| B89  | 0.83  | 0.91  | 0.50  |
| B93  | 1.56  | 0.95  | 0.42  |
| B99  | 2.17  | 2.22  | 0.45  |
| B103 | 0.73  | 1.12  | 0.27  |
| B107 | 0.24  | 0.36  | 0.22  |
| B111 | 0.32  | 1.71  | 0.26  |
| B114 | 0.81  | 1.20  | 0.23  |
| B118 | 1.31  | 1.03  | 1.53  |
| B122 | 1.82  | 2.40  | 47.55 |
| B127 | 3.22  | 2.20  | 2.22  |
| B131 | 0.30  | 0.59  | 0.14  |
| B136 | 1.18  | 2.04  | 0.92  |
| B139 | 2.39  | 1.58  | 1.97  |
| B144 | 0.65  | 1.99  | 0.38  |
| B148 | 5.63  | 3.48  | 2.19  |
| B151 | 0.45  | 0.76  | 0.00  |
| B158 | 1.70  | 1.44  | 0.87  |
| B161 | 0.95  | 1.75  | 0.40  |
| B164 | 0.23  | 0.21  | 0.02  |
| B168 | 0.79  | 0.96  | 0.83  |
| B171 | 0.37  | 0.27  | 0.20  |
| B175 | 0.37  | 0.17  | 0.00  |
| B182 | 0.21  | 0.34  | 0.02  |
| B187 | 0.33  | 0.41  | 0.04  |
| B190 | 0.18  | 0.78  | 0.40  |
| B196 | 0.27  | 0.19  | 0.29  |
| B199 | 0.75  | 0.13  | 0.30  |
| B204 | 0.73  | 0.25  | 0.20  |
| B207 | 0.46  | 0.17  | 0.10  |
| B211 | 0.48  | 0.54  | 0.07  |
| B214 | 0.29  | 0.00  | 0.00  |
| B219 | 0.09  | 0.03  | 0.12  |
| B224 | 0.80  | 0.84  | 0.26  |
| B227 | 0.35  | 0.00  | 0.10  |
| B230 | 0.34  | 0.65  | 0.02  |
| B234 | 0.00  | 0.06  | 0.00  |

|      |      |      |      |
|------|------|------|------|
| B236 | 0.04 | 0.09 | 0.00 |
| B241 | 0.10 | 0.19 | 0.05 |
| B244 | 0.16 | 0.00 | 0.00 |
| B249 | 0.00 | 0.47 | 0.11 |
| B258 | 0.85 | 0.00 | 0.00 |
| B263 | 0.38 | 0.27 | 0.52 |
| B267 | 0.10 | 0.11 | 0.00 |
| B275 | 0.32 | 0.71 | 0.19 |
| B279 | 1.01 | 1.32 | 0.36 |
| B282 | 0.00 | 0.09 | 0.22 |
| B287 | 0.56 | 0.23 | 0.50 |
| B290 | 0.00 | 0.00 | 0.16 |
| B293 | 0.18 | 0.30 | 0.41 |
| B301 | 0.00 | 0.17 | 0.00 |
| B304 | 0.13 | 0.06 | 0.00 |
| B322 | 0.10 | 0.53 | 0.03 |
| B331 | 0.62 | 0.00 | 0.19 |
| B338 | 0.06 | 0.00 | 0.00 |
| B370 | 0.00 | 0.07 | 0.00 |
| B377 | 0.10 | 0.00 | 0.00 |
| B380 | 0.01 | 0.00 | 0.16 |
| B384 | 0.00 | 0.09 | 0.00 |
| B398 | 0.04 | 0.30 | 0.00 |
| B401 | 0.12 | 0.70 | 0.00 |
| B422 | 0.10 | 0.04 | 0.14 |
| B427 | 0.06 | 0.08 | 0.25 |
| B433 | 0.32 | 0.08 | 0.33 |
| B438 | 0.78 | 0.77 | 0.27 |
| B446 | 0.11 | 0.09 | 0.34 |
| B455 | 0.09 | 0.07 | 0.24 |
| B462 | 0.04 | 0.04 | 0.16 |
| B468 | 0.06 | 0.61 | 0.13 |
| B472 | 0.11 | 0.11 | 0.21 |
| B480 | 0.00 | 0.00 | 0.09 |
| B488 | 0.95 | 0.81 | 0.40 |
| B492 | 0.63 | 0.59 | 0.05 |
| B495 | 0.17 | 0.34 | 0.14 |
| B500 | 0.14 | 0.15 | 0.19 |
| B505 | 0.30 | 0.15 | 0.43 |
| B509 | 0.17 | 0.23 | 0.21 |
| B516 | 0.54 | 0.89 | 0.48 |
| B520 | 0.04 | 0.04 | 0.06 |
| B526 | 0.26 | 0.30 | 0.47 |
| B533 | 0.37 | 0.18 | 0.17 |
| B538 | 0.22 | 0.15 | 0.07 |
| B561 | 0.04 | 0.06 | 0.19 |
| B576 | 0.06 | 0.08 | 0.05 |
| B579 | 0.00 | 0.00 | 0.06 |
| B586 | 0.00 | 0.05 | 0.00 |
| B592 | 0.03 | 0.06 | 0.00 |
| B645 | 0.00 | 0.06 | 0.00 |
| B802 | 0.21 | 0.00 | 0.15 |

---
