# Supplementary material for: Long‐term ferrocyanide application via deicing salts promotes the establishment of Actinomycetales assimilating ferrocyanide‐derived carbon in soil
Source: PubMed Central journal article supplement (PMC4919992; doi:10.1111/1751-7915.12362), 2016-05-19
Supplement: MBT2-9-502-s005.pdf [file MBT2-9-502-s005.pdf]

Table S2

Relative abundance (%) of sequences >1% in at least one gradient fraction assigned to genus level obtained from the reconstructed OTU profile by summarized gradient fractions from soil D, F and W based on partial 16S rRNA gene sequences after DNA extraction and PCR amplification. Genera containing <sup>13</sup>C-labelled OTUs are highlighted in grey.

| phylum         | class              | order               | family               | genus                    | D    | F    | W    |
|----------------|--------------------|---------------------|----------------------|--------------------------|------|------|------|
| Acidobacteria  | Acidobacteria_Gp1  | incertae_sedis      | incertae_sedis       | <i>Gp1</i>               | 1.07 | 0.02 | 1.01 |
| Acidobacteria  | Acidobacteria_Gp3  | incertae_sedis      | incertae_sedis       | <i>Gp3</i>               | 1.70 | 1.39 | 3.00 |
| Acidobacteria  | Acidobacteria_Gp4  | incertae_sedis      | incertae_sedis       | <i>Gp4</i>               | 0.50 | 0.98 | 1.79 |
| Acidobacteria  | Acidobacteria_Gp5  | incertae_sedis      | incertae_sedis       | <i>Gp5</i>               | 0.10 | 0.01 | 0.81 |
| Acidobacteria  | Acidobacteria_Gp6  | incertae_sedis      | incertae_sedis       | <i>Gp6</i>               | 1.50 | 0.75 | 3.48 |
| Acidobacteria  | Acidobacteria_Gp7  | incertae_sedis      | incertae_sedis       | <i>Gp7</i>               | 0.35 | 0.04 | 0.69 |
| Acidobacteria  | Acidobacteria_Gp10 | incertae_sedis      | incertae_sedis       | <i>Gp10</i>              | 0.26 | 0.02 | 0.02 |
| Acidobacteria  | Acidobacteria_Gp16 | incertae_sedis      | incertae_sedis       | <i>Gp16</i>              | 2.45 | 2.06 | 3.19 |
| Acidobacteria  | Acidobacteria_Gp17 | incertae_sedis      | incertae_sedis       | <i>Gp17</i>              | 0.24 | 0.20 | 1.09 |
| Acidobacteria  | Acidobacteria_Gp22 | incertae_sedis      | incertae_sedis       | <i>Gp22</i>              | 0.01 | 0.00 | 0.73 |
| Actinobacteria | Actinobacteria     | Acidimicrobiales    | Acidimicrobiaceae    | <i>Ilumatobacter</i>     | 1.33 | 3.46 | 2.39 |
| Actinobacteria | Actinobacteria     | Acidimicrobiales    | lamiaceae            | <i>Iamia</i>             | 0.64 | 0.53 | 0.64 |
| Actinobacteria | Actinobacteria     | Acidimicrobiales    | unclassified         | unclassified             | 2.68 | 2.78 | 2.63 |
| Actinobacteria | Actinobacteria     | Actinomycetales     | Cellulomonadaceae    | <i>Cellulomonas</i>      | 0.03 | 0.50 | 0.11 |
| Actinobacteria | Actinobacteria     | Actinomycetales     | Corynebacteriaceae   | <i>Corynebacterium</i>   | 0.81 | 0.05 | 0.15 |
| Actinobacteria | Actinobacteria     | Actinomycetales     | Geodermatophilaceae  | <i>Blastococcus</i>      | 0.19 | 0.63 | 0.06 |
| Actinobacteria | Actinobacteria     | Actinomycetales     | Intrasporangiaceae   | unclassified             | 0.62 | 2.81 | 0.49 |
| Actinobacteria | Actinobacteria     | Actinomycetales     | Kineosporiaceae      | <i>Kineosporia</i>       | 0.56 | 2.59 | 0.43 |
| Actinobacteria | Actinobacteria     | Actinomycetales     | Microbacteriaceae    | <i>Agromyces</i>         | 0.12 | 0.36 | 0.35 |
| Actinobacteria | Actinobacteria     | Actinomycetales     | Microbacteriaceae    | unclassified             | 0.98 | 2.13 | 0.56 |
| Actinobacteria | Actinobacteria     | Actinomycetales     | Micrococcaceae       | <i>Arthrobacter</i>      | 0.92 | 3.37 | 0.90 |
| Actinobacteria | Actinobacteria     | Actinomycetales     | Micromonosporaceae   | unclassified             | 2.93 | 3.74 | 2.79 |
| Actinobacteria | Actinobacteria     | Actinomycetales     | Micromonosporaceae   | <i>Virgisporangium</i>   | 0.03 | 0.17 | 0.00 |
| Actinobacteria | Actinobacteria     | Actinomycetales     | Mycobacteriaceae     | <i>Mycobacterium</i>     | 2.04 | 2.16 | 1.80 |
| Actinobacteria | Actinobacteria     | Actinomycetales     | Nakamurellaceae      | <i>Humicoccus</i>        | 0.15 | 2.77 | 0.50 |
| Actinobacteria | Actinobacteria     | Actinomycetales     | Nocardiaceae         | unclassified             | 0.12 | 1.29 | 0.36 |
| Actinobacteria | Actinobacteria     | Actinomycetales     | Nocardiodaceae       | <i>Nocardioides</i>      | 2.82 | 4.66 | 1.59 |
| Actinobacteria | Actinobacteria     | Actinomycetales     | Nocardiodaceae       | unclassified             | 2.05 | 4.56 | 1.66 |
| Actinobacteria | Actinobacteria     | Actinomycetales     | Propionibacteriaceae | <i>Propionibacterium</i> | 0.46 | 0.17 | 0.32 |
| Actinobacteria | Actinobacteria     | Actinomycetales     | Propionibacteriaceae | unclassified             | 0.24 | 0.51 | 0.28 |
| Actinobacteria | Actinobacteria     | Actinomycetales     | Pseudonocardiaceae   | <i>Actinophytocola</i>   | 0.77 | 0.00 | 0.00 |
| Actinobacteria | Actinobacteria     | Actinomycetales     | Pseudonocardiaceae   | <i>Pseudonocardia</i>    | 0.16 | 0.68 | 0.05 |
| Actinobacteria | Actinobacteria     | Actinomycetales     | Pseudonocardiaceae   | unclassified             | 0.37 | 0.77 | 0.27 |
| Actinobacteria | Actinobacteria     | Actinomycetales     | Streptomycetaceae    | unclassified             | 1.47 | 1.17 | 0.86 |
| Actinobacteria | Actinobacteria     | Actinomycetales     | Streptosporangiaceae | unclassified             | 0.10 | 0.01 | 0.05 |
| Actinobacteria | Actinobacteria     | Actinomycetales     | unclassified         | unclassified             | 2.64 | 2.59 | 2.90 |
| Actinobacteria | Actinobacteria     | Rubrobacterales     | Rubrobacteraceae     | <i>Rubrobacter</i>       | 0.15 | 0.00 | 0.00 |
| Actinobacteria | Actinobacteria     | Solirubrobacterales | unclassified         | unclassified             | 2.62 | 2.44 | 1.63 |
| Actinobacteria | Actinobacteria     | unclassified        | unclassified         | unclassified             | 8.55 | 5.71 | 7.68 |
| Bacteroidetes  | Bacteroidia        | Bacteroidales       | Porphyromonadaceae   | <i>Dysgonomonas</i>      | 0.11 | 0.00 | 0.00 |
| Bacteroidetes  | Bacteroidia        | Bacteroidales       | Porphyromonadaceae   | <i>Porphyromonas</i>     | 0.04 | 0.30 | 0.06 |
| Bacteroidetes  | Flavobacteria      | Flavobacteriales    | Flavobacteriaceae    | <i>Flavobacterium</i>    | 9.24 | 5.77 | 8.09 |
| Bacteroidetes  | Flavobacteria      | Flavobacteriales    | Flavobacteriaceae    | unclassified             | 6.20 | 0.11 | 0.43 |
| Bacteroidetes  | Sphingobacteria    | Sphingobacteriales  | Cytophagaceae        | <i>Adhaeribacter</i>     | 0.01 | 2.41 | 0.05 |
| Bacteroidetes  | Sphingobacteria    | Sphingobacteriales  | Sphingobacteriaceae  | <i>Mucilagibacter</i>    | 0.46 | 0.42 | 0.30 |

|                  |                     |                    |                     |                       |      |      |      |
|------------------|---------------------|--------------------|---------------------|-----------------------|------|------|------|
| Bacteroidetes    | Sphingobacteria     | Sphingobacteriales | Sphingobacteriaceae | <i>Pedobacter</i>     | 0.08 | 0.44 | 0.20 |
| Bacteroidetes    | Sphingobacteria     | Sphingobacteriales | Sphingobacteriaceae | unclassified          | 0.15 | 0.00 | 0.02 |
| Bacteroidetes    | Sphingobacteria     | Sphingobacteriales | unclassified        | unclassified          | 0.03 | 0.30 | 0.02 |
| Bacteroidetes    | unclassified        | unclassified       | unclassified        | unclassified          | 2.90 | 2.31 | 2.67 |
| Firmicutes       | Bacilli             | Bacillales         | Staphylococcaceae   | <i>Staphylococcus</i> | 0.22 | 0.19 | 0.15 |
| Gemmatimonadetes | Gemmatimonadetes    | Gemmatimonadales   | Gemmatimonadaceae   | <i>Gemmatimonas</i>   | 2.09 | 1.31 | 1.57 |
| Nitrospira       | Nitrospira          | Nitrospirales      | Nitrospiraceae      | <i>Nitrospira</i>     | 0.41 | 0.20 | 0.39 |
| Proteobacteria   | Alphaproteobacteria | Rhizobiales        | Hyphomicrobiaceae   | <i>Hyphomicrobium</i> | 0.34 | 0.44 | 0.23 |
| Proteobacteria   | Alphaproteobacteria | Rhizobiales        | Hyphomicrobiaceae   | unclassified          | 0.68 | 0.98 | 0.40 |
| Proteobacteria   | Alphaproteobacteria | Rhizobiales        | unclassified        | unclassified          | 3.13 | 2.41 | 2.49 |
| Proteobacteria   | Alphaproteobacteria | unclassified       | unclassified        | unclassified          | 0.57 | 0.40 | 0.62 |
| Proteobacteria   | Betaproteobacteria  | Burkholderiales    | Comamonadaceae      | <i>Diaphorobacter</i> | 0.33 | 0.04 | 0.01 |
| Proteobacteria   | Betaproteobacteria  | unclassified       | unclassified        | unclassified          | 0.89 | 0.66 | 1.79 |
| Proteobacteria   | Deltaproteobacteria | Myxococcales       | unclassified        | unclassified          | 0.65 | 1.12 | 1.08 |
| Proteobacteria   | Deltaproteobacteria | unclassified       | unclassified        | unclassified          | 0.26 | 0.37 | 0.91 |
| Proteobacteria   | Gammaproteobacteria | Chromatiales       | unclassified        | unclassified          | 0.01 | 0.00 | 0.15 |
| Proteobacteria   | Gammaproteobacteria | Enterobacteriales  | Enterobacteriaceae  | <i>Pantoea</i>        | 0.00 | 0.30 | 0.01 |
| Proteobacteria   | Gammaproteobacteria | Enterobacteriales  | Enterobacteriaceae  | unclassified          | 1.13 | 0.97 | 0.21 |
| Proteobacteria   | Gammaproteobacteria | Pseudomonadales    | Moraxellaceae       | <i>Acinetobacter</i>  | 2.68 | 0.80 | 0.93 |
| Proteobacteria   | Gammaproteobacteria | Pseudomonadales    | Moraxellaceae       | <i>Enhydrobacter</i>  | 0.31 | 0.22 | 0.10 |
| Proteobacteria   | Gammaproteobacteria | Pseudomonadales    | Pseudomonadaceae    | <i>Pseudomonas</i>    | 1.33 | 0.43 | 0.14 |
| Proteobacteria   | Gammaproteobacteria | unclassified       | unclassified        | unclassified          | 2.03 | 2.42 | 3.09 |
| Proteobacteria   | Gammaproteobacteria | Xanthomonadales    | Sinobacteraceae     | <i>Steroidobacter</i> | 0.35 | 1.24 | 0.47 |
| Proteobacteria   | Gammaproteobacteria | Xanthomonadales    | Xanthomonadaceae    | <i>Lysobacter</i>     | 0.10 | 0.68 | 0.37 |
| Proteobacteria   | Gammaproteobacteria | Xanthomonadales    | Xanthomonadaceae    | <i>Thermomonas</i>    | 0.00 | 0.02 | 0.56 |
| Proteobacteria   | Gammaproteobacteria | Xanthomonadales    | Xanthomonadaceae    | unclassified          | 0.62 | 1.05 | 1.58 |
| Proteobacteria   | unclassified        | unclassified       | unclassified        | unclassified          | 0.81 | 1.23 | 1.11 |
| Spirochaetes     | Spirochaetes        | Spirochaetales     | Spirochaetaceae     | <i>Treponema</i>      | 0.15 | 0.00 | 0.00 |
| Verrucomicrobia  | Spartobacteria      | incertae sedis     | incertae sedis      | incertae sedis        | 1.16 | 0.58 | 1.23 |
