# Supplementary material for: Long‐term ferrocyanide application via deicing salts promotes the establishment of Actinomycetales assimilating ferrocyanide‐derived carbon in soil
Source: PubMed Central journal article supplement (PMC4919992; doi:10.1111/1751-7915.12362), 2016-05-19
Supplement: MBT2-9-502-s006.pdf [file MBT2-9-502-s006.pdf]

Table S3

Relative abundance (%) of sequences > 1% in at least one gradient fraction assigned to genus level obtained from 6 gradient fractions of DNA extracted from <sup>13</sup>C-labelled and unlabeled soil D, F and W based on partial 16S rRNA gene sequences after PCR amplification. Buoyant density increased among fractions 11 < 9 < 7 < 5 < 3 < 1. Genera containing <sup>13</sup>C-labelled OTUs are highlighted in grey.

| soil D                        | unlabeled |         |         |         |         |         | <sup>13</sup> C-labelled |         |         |         |         |         |
|-------------------------------|-----------|---------|---------|---------|---------|---------|--------------------------|---------|---------|---------|---------|---------|
|                               | fract.11  | fract.9 | fract.7 | fract.5 | fract.3 | fract.1 | fract.11                 | fract.9 | fract.7 | fract.5 | fract.3 | fract.1 |
| <i>Gp1</i>                    | 1.95      | 0.97    | 0.68    | 0.00    | 0.00    | 0.00    | 1.21                     | 2.00    | 1.25    | 1.69    | 2.58    | 0.46    |
| <i>Gp3</i>                    | 1.25      | 1.17    | 0.96    | 2.69    | 0.00    | 2.32    | 1.13                     | 2.16    | 1.62    | 2.06    | 3.39    | 1.65    |
| <i>Gp4</i>                    | 1.53      | 0.15    | 0.25    | 1.45    | 0.00    | 0.70    | 0.88                     | 0.40    | 0.22    | 0.08    | 0.36    | 0.01    |
| <i>Gp5</i>                    | 0.18      | 0.09    | 0.06    | 0.00    | 0.01    | 0.00    | 0.09                     | 0.15    | 0.16    | 0.10    | 0.38    | 0.00    |
| <i>Gp6</i>                    | 1.09      | 2.29    | 1.52    | 0.00    | 0.28    | 2.53    | 1.02                     | 2.45    | 1.51    | 1.20    | 1.47    | 2.65    |
| <i>Gp7</i>                    | 0.09      | 0.50    | 0.60    | 0.00    | 0.00    | 0.00    | 0.12                     | 0.62    | 0.61    | 1.13    | 0.00    | 0.52    |
| <i>Gp10</i>                   | 0.04      | 0.21    | 0.15    | 0.96    | 1.05    | 0.00    | 0.10                     | 0.23    | 0.18    | 0.00    | 0.23    | 0.00    |
| <i>Gp16</i>                   | 0.40      | 4.06    | 4.91    | 1.27    | 0.41    | 2.26    | 0.85                     | 4.35    | 3.82    | 3.60    | 1.49    | 2.03    |
| <i>Gp17</i>                   | 0.03      | 0.41    | 0.49    | 0.00    | 0.08    | 0.00    | 0.06                     | 0.23    | 0.45    | 0.13    | 0.31    | 0.64    |
| <i>Gp22</i>                   | 0.00      | 0.09    | 0.00    | 0.00    | 0.00    | 0.00    | 0.00                     | 0.02    | 0.02    | 0.00    | 0.00    | 0.00    |
| <i>Ilumatobacter</i>          | 0.78      | 2.29    | 1.43    | 0.00    | 0.61    | 0.00    | 0.65                     | 2.22    | 2.44    | 1.58    | 1.78    | 2.15    |
| <i>Iamia</i>                  | 0.20      | 1.38    | 0.90    | 0.00    | 0.00    | 0.01    | 0.25                     | 1.17    | 0.86    | 1.57    | 0.99    | 0.34    |
| <i>Acidimicrobiales_u</i>     | 0.68      | 4.70    | 4.46    | 2.41    | 0.01    | 3.42    | 0.99                     | 3.77    | 3.55    | 2.92    | 4.15    | 1.08    |
| <i>Cellulomonas</i>           | 0.02      | 0.05    | 0.11    | 0.00    | 0.00    | 0.00    | 0.02                     | 0.16    | 0.03    | 0.01    | 0.00    | 0.01    |
| <i>Corynebacterium</i>        | 0.00      | 0.00    | 0.00    | 0.00    | 0.01    | 9.69    | 0.00                     | 0.00    | 0.00    | 0.00    | 0.00    | 0.00    |
| <i>Blastococcus</i>           | 0.04      | 0.24    | 0.50    | 0.00    | 0.00    | 0.00    | 0.09                     | 0.23    | 0.35    | 0.31    | 0.09    | 0.47    |
| <i>Intrasporangiaceae_u</i>   | 0.11      | 0.61    | 1.09    | 0.06    | 0.18    | 0.00    | 0.26                     | 0.72    | 0.69    | 0.74    | 2.33    | 0.70    |
| <i>Kineosporia</i>            | 0.13      | 0.50    | 0.87    | 2.62    | 0.00    | 0.00    | 0.10                     | 0.43    | 0.45    | 0.00    | 0.00    | 1.60    |
| <i>Agromyces</i>              | 0.03      | 0.11    | 0.04    | 0.00    | 0.12    | 0.00    | 0.05                     | 0.21    | 0.13    | 0.00    | 0.35    | 0.36    |
| <i>Microbacteriaceae_u</i>    | 0.26      | 0.89    | 1.14    | 0.71    | 0.00    | 3.06    | 0.28                     | 0.76    | 0.93    | 0.58    | 2.47    | 0.69    |
| <i>Arthrobacter</i>           | 0.44      | 0.65    | 0.43    | 0.19    | 0.26    | 0.02    | 1.00                     | 1.70    | 1.37    | 2.15    | 1.75    | 1.02    |
| <i>Micromonosporaceae_u</i>   | 0.97      | 3.97    | 5.50    | 2.16    | 0.36    | 1.56    | 0.96                     | 3.19    | 4.55    | 3.95    | 3.65    | 4.38    |
| <i>Virgisporangium</i>        | 0.01      | 0.12    | 0.06    | 0.00    | 0.00    | 0.00    | 0.02                     | 0.04    | 0.05    | 0.03    | 0.00    | 0.00    |
| <i>Mycobacterium</i>          | 0.85      | 2.24    | 2.22    | 5.19    | 0.34    | 0.77    | 0.64                     | 1.80    | 1.38    | 2.53    | 1.77    | 4.69    |
| <i>Humicoccus</i>             | 0.04      | 0.33    | 0.32    | 0.00    | 0.00    | 0.00    | 0.09                     | 0.25    | 0.46    | 0.00    | 0.00    | 0.28    |
| <i>Nocardiaceae_u</i>         | 0.07      | 0.08    | 0.21    | 0.00    | 0.00    | 0.00    | 0.05                     | 0.11    | 0.15    | 0.00    | 0.03    | 0.79    |
| <i>Nocardioides</i>           | 0.73      | 2.39    | 3.31    | 13.18   | 0.33    | 0.56    | 0.68                     | 2.24    | 2.46    | 2.39    | 2.86    | 2.71    |
| <i>Nocardioideaceae_u</i>     | 0.60      | 2.14    | 2.05    | 3.98    | 0.01    | 4.58    | 0.57                     | 1.62    | 1.81    | 3.58    | 2.26    | 1.42    |
| <i>Propionibacterium</i>      | 0.00      | 0.06    | 0.01    | 0.00    | 0.23    | 4.76    | 0.00                     | 0.00    | 0.00    | 0.05    | 0.44    | 0.00    |
| <i>Propionibacteriaceae_u</i> | 0.04      | 0.39    | 0.56    | 0.00    | 0.00    | 0.00    | 0.15                     | 0.27    | 0.27    | 0.44    | 0.69    | 0.00    |
| <i>Actinophytocola</i>        | 0.18      | 0.70    | 1.46    | 2.93    | 0.00    | 0.16    | 0.22                     | 0.62    | 0.57    | 1.20    | 0.77    | 0.44    |
| <i>Pseudonocardia</i>         | 0.00      | 0.11    | 0.10    | 0.00    | 0.00    | 0.95    | 0.01                     | 0.06    | 0.06    | 0.55    | 0.00    | 0.11    |
| <i>Pseudonocardiaceae_u</i>   | 0.12      | 0.67    | 0.73    | 0.06    | 0.00    | 0.00    | 0.07                     | 0.43    | 0.50    | 0.77    | 0.49    | 0.62    |
| <i>Streptomycetaceae_u</i>    | 0.55      | 2.30    | 2.28    | 1.51    | 0.30    | 3.19    | 0.37                     | 1.25    | 1.46    | 1.42    | 1.19    | 1.83    |
| <i>Streptosporangiaceae_u</i> | 0.01      | 0.06    | 0.01    | 0.00    | 0.00    | 1.09    | 0.00                     | 0.00    | 0.02    | 0.00    | 0.00    | 0.00    |
| <i>Actinomycetales_u</i>      | 0.65      | 4.05    | 3.71    | 1.36    | 0.81    | 2.39    | 0.84                     | 3.41    | 3.93    | 4.33    | 3.49    | 2.73    |
| <i>Rubrobacter</i>            | 0.00      | 0.00    | 0.00    | 1.85    | 0.00    | 0.00    | 0.00                     | 0.01    | 0.00    | 0.00    | 0.00    | 0.00    |
| <i>Solirubrobacterales_u</i>  | 0.63      | 4.30    | 5.27    | 0.96    | 0.65    | 0.21    | 0.70                     | 3.41    | 4.10    | 5.43    | 3.06    | 2.70    |
| <i>Actinobacteria_u</i>       | 1.98      | 16.28   | 16.08   | 9.38    | 0.56    | 6.78    | 2.45                     | 11.18   | 13.31   | 8.58    | 10.09   | 5.89    |
| <i>Dysgonomonas</i>           | 0.00      | 0.00    | 0.00    | 0.00    | 1.29    | 0.00    | 0.00                     | 0.00    | 0.00    | 0.00    | 0.00    | 0.00    |
| <i>Porphyromonas</i>          | 0.00      | 0.00    | 0.20    | 0.00    | 0.32    | 0.00    | 0.00                     | 0.00    | 0.00    | 0.00    | 0.00    | 0.00    |
| <i>Flavobacterium</i>         | 34.07     | 0.41    | 1.46    | 0.00    | 0.37    | 0.01    | 43.33                    | 1.72    | 5.26    | 9.92    | 6.10    | 8.23    |

|                              |       |      |      |      |       |       |       |      |      |      |      |      |
|------------------------------|-------|------|------|------|-------|-------|-------|------|------|------|------|------|
| <i>Flavobacteriaceae_u</i>   | 2.08  | 0.02 | 0.25 | 0.49 | 67.78 | 1.53  | 1.55  | 0.09 | 0.15 | 0.14 | 0.35 | 0.04 |
| <i>Adhaeribacter</i>         | 0.02  | 0.02 | 0.00 | 0.00 | 0.00  | 0.00  | 0.05  | 0.01 | 0.00 | 0.00 | 0.00 | 0.00 |
| <i>Mucilaginibacter</i>      | 2.48  | 0.02 | 0.26 | 0.77 | 0.04  | 0.00  | 1.29  | 0.09 | 0.07 | 0.00 | 0.49 | 0.00 |
| <i>Pedobacter</i>            | 0.34  | 0.02 | 0.00 | 0.00 | 0.00  | 0.00  | 0.31  | 0.03 | 0.25 | 0.00 | 0.00 | 0.00 |
| <i>Sphingobacteriaceae_u</i> | 0.22  | 0.00 | 0.00 | 1.27 | 0.00  | 0.00  | 0.13  | 0.02 | 0.01 | 0.00 | 0.18 | 0.00 |
| <i>Sphingobacteriales_u</i>  | 0.10  | 0.00 | 0.00 | 0.03 | 0.01  | 0.01  | 0.09  | 0.06 | 0.00 | 0.00 | 0.01 | 0.00 |
| <i>Bacteroidetes_u</i>       | 12.01 | 0.15 | 0.29 | 1.85 | 0.40  | 2.22  | 10.80 | 0.59 | 1.25 | 2.18 | 1.07 | 2.02 |
| <i>Staphylococcus</i>        | 0.00  | 0.00 | 0.00 | 2.25 | 0.40  | 0.01  | 0.00  | 0.00 | 0.04 | 0.00 | 0.00 | 0.00 |
| <i>Gemmatimonas</i>          | 1.10  | 2.76 | 2.79 | 0.00 | 0.39  | 2.51  | 0.81  | 3.16 | 2.24 | 2.67 | 2.76 | 3.89 |
| <i>Nitrospira</i>            | 0.58  | 0.24 | 0.08 | 0.00 | 0.01  | 0.00  | 0.36  | 0.70 | 0.27 | 0.97 | 0.62 | 1.07 |
| <i>Hyphomicrobium</i>        | 0.18  | 0.42 | 0.30 | 0.00 | 0.08  | 0.00  | 0.19  | 0.42 | 0.37 | 0.83 | 0.86 | 0.44 |
| <i>Hyphomicrobiaceae_u</i>   | 0.34  | 1.24 | 0.76 | 0.00 | 0.00  | 0.00  | 0.47  | 1.42 | 1.38 | 0.47 | 1.66 | 0.41 |
| <i>Rhizobiales_u</i>         | 3.04  | 4.70 | 2.53 | 3.33 | 0.44  | 1.17  | 2.44  | 5.77 | 4.02 | 3.11 | 3.17 | 3.80 |
| <i>Alphaproteobacteria_u</i> | 0.59  | 0.86 | 0.71 | 0.12 | 0.07  | 0.15  | 0.44  | 0.97 | 0.81 | 0.72 | 0.47 | 0.95 |
| <i>Diaphorobacter</i>        | 0.00  | 0.00 | 0.01 | 0.00 | 3.70  | 0.11  | 0.00  | 0.00 | 0.00 | 0.00 | 0.04 | 0.11 |
| <i>Betaproteobacteria_u</i>  | 0.80  | 1.44 | 0.85 | 0.15 | 0.01  | 0.21  | 0.57  | 1.59 | 1.41 | 0.96 | 1.03 | 1.60 |
| <i>Myxococcales_u</i>        | 0.20  | 0.61 | 0.64 | 1.85 | 0.00  | 0.02  | 0.31  | 1.03 | 0.95 | 0.59 | 0.86 | 0.77 |
| <i>Deltaproteobacteria_u</i> | 0.65  | 0.23 | 0.13 | 0.00 | 0.00  | 0.23  | 0.55  | 0.50 | 0.28 | 0.22 | 0.02 | 0.36 |
| <i>Chromatiales_u</i>        | 0.01  | 0.00 | 0.02 | 0.00 | 0.01  | 0.00  | 0.04  | 0.00 | 0.00 | 0.00 | 0.00 | 0.00 |
| <i>Pantoea</i>               | 0.01  | 0.00 | 0.00 | 0.00 | 0.00  | 0.00  | 0.00  | 0.00 | 0.00 | 0.00 | 0.00 | 0.00 |
| <i>Enterobacteriaceae_u</i>  | 0.01  | 0.00 | 0.01 | 3.52 | 1.29  | 7.02  | 0.01  | 0.00 | 0.03 | 0.31 | 1.01 | 0.36 |
| <i>Acinetobacter</i>         | 0.00  | 0.00 | 0.15 | 9.07 | 2.52  | 13.87 | 0.02  | 0.00 | 0.01 | 0.17 | 2.74 | 3.58 |
| <i>Enhydrobacter</i>         | 0.00  | 0.00 | 0.00 | 1.54 | 0.00  | 2.24  | 0.00  | 0.00 | 0.00 | 0.00 | 0.00 | 0.00 |
| <i>Pseudomonas</i>           | 0.10  | 0.09 | 0.02 | 0.90 | 9.44  | 3.55  | 0.10  | 0.08 | 0.13 | 0.67 | 0.15 | 0.72 |
| <i>Gammaproteobacteria_u</i> | 3.54  | 1.92 | 1.53 | 1.51 | 0.17  | 0.02  | 2.17  | 2.04 | 1.92 | 2.20 | 3.89 | 3.42 |
| <i>Steroidobacter</i>        | 0.19  | 0.27 | 0.40 | 0.00 | 0.00  | 0.00  | 0.16  | 0.51 | 0.52 | 1.13 | 0.29 | 0.77 |
| <i>Lysobacter</i>            | 0.03  | 0.05 | 0.00 | 1.02 | 0.00  | 0.00  | 0.00  | 0.06 | 0.07 | 0.00 | 0.03 | 0.00 |
| <i>Thermomonas</i>           | 0.00  | 0.02 | 0.00 | 0.00 | 0.01  | 0.00  | 0.01  | 0.00 | 0.00 | 0.00 | 0.00 | 0.00 |
| <i>Xanthomonadaceae_u</i>    | 0.28  | 0.32 | 0.33 | 3.27 | 1.20  | 0.01  | 0.08  | 0.26 | 0.21 | 0.18 | 0.44 | 0.92 |
| <i>Proteobacteria_u</i>      | 1.02  | 0.76 | 0.30 | 0.56 | 0.18  | 1.91  | 0.96  | 1.12 | 1.05 | 1.00 | 0.53 | 0.39 |
| <i>Treponema</i>             | 0.00  | 0.00 | 0.00 | 0.00 | 0.00  | 1.79  | 0.00  | 0.00 | 0.00 | 0.00 | 0.00 | 0.00 |
| <i>Spartobacteria_u</i>      | 3.01  | 0.83 | 0.44 | 0.00 | 0.18  | 0.65  | 2.14  | 2.04 | 1.47 | 0.55 | 0.95 | 1.65 |

| soil F                      | unlabeled |         |         |         |         |         | <sup>13</sup> C-labelled |         |         |         |         |         |
|-----------------------------|-----------|---------|---------|---------|---------|---------|--------------------------|---------|---------|---------|---------|---------|
|                             | fract.11  | fract.9 | fract.7 | fract.5 | fract.3 | fract.1 | fract.11                 | fract.9 | fract.7 | fract.5 | fract.3 | fract.1 |
| Gp1                         | 0.06      | 0.01    | 0.09    | 0.00    | 0.00    | 0.00    | 0.03                     | 0.03    | 0.00    | 0.00    | 0.00    | 0.00    |
| Gp3                         | 1.48      | 1.04    | 2.20    | 0.80    | 2.31    | 1.03    | 0.98                     | 1.80    | 0.67    | 1.25    | 2.45    | 0.72    |
| Gp4                         | 2.89      | 0.43    | 0.74    | 0.53    | 0.31    | 0.68    | 1.07                     | 2.23    | 0.42    | 0.70    | 1.72    | 0.00    |
| Gp5                         | 0.02      | 0.00    | 0.00    | 0.00    | 0.00    | 0.00    | 0.01                     | 0.01    | 0.00    | 0.00    | 0.05    | 0.00    |
| Gp6                         | 0.61      | 0.94    | 0.80    | 0.96    | 0.24    | 1.17    | 0.43                     | 0.98    | 0.77    | 0.33    | 0.98    | 0.75    |
| Gp7                         | 0.04      | 0.03    | 0.00    | 0.00    | 0.00    | 0.14    | 0.01                     | 0.01    | 0.01    | 0.14    | 0.05    | 0.00    |
| Gp10                        | 0.09      | 0.00    | 0.00    | 0.18    | 0.00    | 0.00    | 0.00                     | 0.00    | 0.00    | 0.00    | 0.00    | 0.00    |
| Gp16                        | 0.51      | 4.59    | 2.66    | 2.13    | 2.74    | 1.38    | 1.24                     | 1.58    | 3.81    | 1.02    | 1.30    | 1.70    |
| Gp17                        | 0.04      | 0.43    | 0.17    | 0.32    | 0.00    | 0.00    | 0.15                     | 0.13    | 0.39    | 0.64    | 0.11    | 0.00    |
| Gp22                        | 0.00      | 0.00    | 0.00    | 0.00    | 0.00    | 0.00    | 0.00                     | 0.00    | 0.00    | 0.00    | 0.00    | 0.00    |
| <i>Ilumatobacter</i>        | 1.73      | 4.52    | 4.20    | 3.32    | 5.19    | 3.21    | 2.68                     | 3.82    | 3.68    | 3.69    | 2.86    | 2.57    |
| <i>lamia</i>                | 0.16      | 0.93    | 0.67    | 0.14    | 0.71    | 0.74    | 0.21                     | 0.42    | 1.05    | 1.08    | 0.20    | 0.00    |
| <i>Acidimicrobiales_u</i>   | 0.83      | 4.38    | 3.00    | 4.16    | 2.45    | 2.43    | 1.29                     | 2.14    | 4.65    | 2.66    | 2.75    | 2.64    |
| <i>Cellulomonas</i>         | 0.11      | 0.57    | 0.74    | 0.29    | 0.00    | 0.00    | 0.06                     | 0.21    | 0.41    | 0.50    | 0.56    | 2.57    |
| <i>Corynebacterium</i>      | 0.00      | 0.00    | 0.00    | 0.00    | 0.00    | 0.00    | 0.00                     | 0.00    | 0.00    | 0.63    | 0.00    | 0.00    |
| <i>Blastococcus</i>         | 0.06      | 0.15    | 0.36    | 0.00    | 0.07    | 0.22    | 0.30                     | 0.48    | 1.28    | 0.82    | 0.78    | 3.07    |
| <i>Intrasporangiaceae_u</i> | 0.75      | 2.67    | 1.79    | 3.44    | 1.80    | 4.98    | 1.81                     | 2.32    | 3.24    | 3.94    | 2.54    | 4.48    |

|                               |       |      |      |      |      |      |       |      |       |      |      |      |
|-------------------------------|-------|------|------|------|------|------|-------|------|-------|------|------|------|
| <i>Kineosporia</i>            | 0.89  | 3.31 | 3.10 | 1.92 | 2.57 | 2.91 | 1.41  | 2.52 | 3.94  | 2.49 | 3.21 | 2.87 |
| <i>Agromyces</i>              | 0.10  | 0.22 | 0.14 | 0.53 | 0.00 | 1.48 | 0.16  | 0.20 | 0.39  | 0.54 | 0.35 | 0.26 |
| <i>Microbacteriaceae_u</i>    | 0.86  | 2.78 | 2.73 | 2.58 | 3.82 | 1.05 | 1.44  | 1.85 | 2.36  | 0.84 | 2.29 | 2.97 |
| <i>Arthrobacter</i>           | 2.09  | 2.16 | 2.25 | 3.27 | 3.02 | 1.86 | 2.89  | 5.11 | 2.26  | 5.38 | 4.80 | 5.30 |
| <i>Micromonosporaceae_u</i>   | 0.84  | 4.68 | 5.20 | 5.03 | 5.46 | 2.00 | 1.58  | 2.15 | 4.52  | 4.74 | 3.45 | 5.27 |
| <i>Virgisporangium</i>        | 0.02  | 0.08 | 0.11 | 0.00 | 0.00 | 0.00 | 0.04  | 0.04 | 0.06  | 0.00 | 0.15 | 1.54 |
| <i>Mycobacterium</i>          | 0.76  | 1.82 | 1.92 | 3.83 | 2.16 | 1.90 | 1.18  | 2.18 | 2.10  | 1.85 | 3.23 | 2.95 |
| <i>Humicoccus</i>             | 0.94  | 3.73 | 3.69 | 3.08 | 3.05 | 0.83 | 1.58  | 2.84 | 3.40  | 5.06 | 2.86 | 2.15 |
| <i>Nocardiaceae_u</i>         | 0.28  | 0.48 | 0.82 | 0.07 | 3.03 | 7.12 | 0.33  | 0.38 | 0.52  | 1.48 | 0.93 | 0.01 |
| <i>Nocardioides</i>           | 1.38  | 4.67 | 4.99 | 7.02 | 5.61 | 5.96 | 2.75  | 3.69 | 5.89  | 7.92 | 5.27 | 0.78 |
| <i>Nocardioidaceae_u</i>      | 1.24  | 4.36 | 4.41 | 3.87 | 6.92 | 2.58 | 2.32  | 3.52 | 6.45  | 7.52 | 5.91 | 5.57 |
| <i>Propionibacterium</i>      | 0.00  | 0.00 | 0.00 | 0.39 | 0.45 | 0.37 | 0.00  | 0.00 | 0.01  | 0.36 | 0.00 | 0.49 |
| <i>Propionibacteriaceae_u</i> | 0.30  | 1.00 | 0.55 | 0.21 | 0.66 | 0.00 | 0.36  | 0.68 | 0.98  | 0.41 | 0.93 | 0.01 |
| <i>Actinophytocola</i>        | 0.00  | 0.00 | 0.00 | 0.00 | 0.00 | 0.00 | 0.00  | 0.00 | 0.00  | 0.00 | 0.00 | 0.00 |
| <i>Pseudonocardia</i>         | 0.07  | 0.57 | 0.64 | 0.80 | 2.19 | 1.12 | 0.09  | 0.33 | 0.57  | 1.17 | 0.66 | 0.01 |
| <i>Pseudonocardiaceae_u</i>   | 0.12  | 0.62 | 0.55 | 0.17 | 1.68 | 1.70 | 0.38  | 0.46 | 0.76  | 0.79 | 1.99 | 0.01 |
| <i>Streptomycetaceae_u</i>    | 0.46  | 1.50 | 1.92 | 1.40 | 1.27 | 0.50 | 0.71  | 0.52 | 1.70  | 2.22 | 1.75 | 0.09 |
| <i>Streptosporangiaceae_u</i> | 0.00  | 0.01 | 0.00 | 0.00 | 0.00 | 0.00 | 0.00  | 0.01 | 0.00  | 0.14 | 0.00 | 0.00 |
| <i>Actinomycetales_u</i>      | 0.65  | 3.76 | 3.25 | 3.51 | 2.53 | 2.30 | 1.67  | 2.22 | 3.43  | 3.02 | 1.57 | 3.11 |
| <i>Rubrobacter</i>            | 0.00  | 0.00 | 0.00 | 0.00 | 0.00 | 0.00 | 0.00  | 0.00 | 0.00  | 0.00 | 0.00 | 0.00 |
| <i>Solirubrobacteriales_u</i> | 0.59  | 3.54 | 2.76 | 2.79 | 3.69 | 2.65 | 1.41  | 1.81 | 4.27  | 1.71 | 3.00 | 1.02 |
| <i>Actinobacteria_u</i>       | 1.18  | 9.75 | 6.25 | 6.12 | 5.39 | 3.76 | 2.74  | 4.06 | 10.29 | 5.76 | 3.69 | 9.49 |
| <i>Dysgonomonas</i>           | 0.00  | 0.00 | 0.00 | 0.00 | 0.00 | 0.00 | 0.00  | 0.03 | 0.00  | 0.00 | 0.00 | 0.00 |
| <i>Porphyromonas</i>          | 0.00  | 0.00 | 0.07 | 0.00 | 0.00 | 0.00 | 0.06  | 0.00 | 0.00  | 0.00 | 0.22 | 3.24 |
| <i>Flavobacterium</i>         | 23.35 | 0.30 | 3.55 | 3.50 | 3.22 | 1.38 | 21.79 | 5.19 | 0.77  | 0.68 | 1.94 | 3.51 |
| <i>Flavobacteriaceae_u</i>    | 0.39  | 0.00 | 0.19 | 0.04 | 0.13 | 0.00 | 0.33  | 0.23 | 0.01  | 0.00 | 0.01 | 0.02 |
| <i>Adhaeribacter</i>          | 11.30 | 0.24 | 1.36 | 1.02 | 0.83 | 0.00 | 5.97  | 4.68 | 0.10  | 0.27 | 1.96 | 1.17 |
| <i>Mucilaginibacter</i>       | 1.74  | 0.00 | 0.31 | 1.11 | 0.00 | 0.48 | 0.80  | 0.46 | 0.08  | 0.00 | 0.06 | 0.00 |
| <i>Pedobacter</i>             | 1.45  | 0.02 | 0.29 | 0.48 | 0.00 | 0.00 | 1.50  | 0.55 | 0.06  | 0.00 | 0.97 | 0.00 |
| <i>Sphingobacteriaceae_u</i>  | 0.03  | 0.00 | 0.00 | 0.00 | 0.00 | 0.00 | 0.00  | 0.01 | 0.00  | 0.00 | 0.01 | 0.00 |
| <i>Sphingobacteriales_u</i>   | 1.06  | 0.00 | 0.01 | 0.11 | 0.00 | 1.50 | 0.73  | 0.16 | 0.03  | 0.00 | 0.00 | 0.00 |
| <i>Bacteroidetes_u</i>        | 8.39  | 0.27 | 0.85 | 3.14 | 0.77 | 2.41 | 7.17  | 1.20 | 0.13  | 1.63 | 1.70 | 0.02 |
| <i>Staphylococcus</i>         | 0.00  | 0.00 | 0.07 | 0.00 | 0.13 | 1.34 | 0.00  | 0.00 | 0.06  | 0.00 | 0.01 | 0.64 |
| <i>Gemmatimonas</i>           | 0.74  | 1.79 | 1.80 | 1.83 | 2.08 | 0.97 | 0.84  | 1.12 | 1.71  | 1.16 | 1.61 | 0.03 |
| <i>Nitrospira</i>             | 0.40  | 0.11 | 0.20 | 0.07 | 0.00 | 0.47 | 0.18  | 0.48 | 0.09  | 0.19 | 0.15 | 0.00 |
| <i>Hyphomicrobium</i>         | 0.41  | 0.66 | 0.58 | 0.20 | 0.00 | 0.91 | 0.36  | 0.67 | 0.53  | 0.07 | 0.87 | 0.00 |
| <i>Hyphomicrobiaceae_u</i>    | 0.56  | 1.55 | 1.25 | 1.35 | 0.67 | 0.50 | 0.73  | 1.45 | 1.14  | 1.10 | 0.64 | 0.82 |
| <i>Rhizobiales_u</i>          | 2.42  | 2.82 | 2.10 | 2.96 | 1.55 | 2.00 | 1.92  | 4.38 | 1.51  | 2.35 | 3.27 | 1.59 |
| <i>Alphaproteobacteria_u</i>  | 0.34  | 0.40 | 0.31 | 0.24 | 0.42 | 0.00 | 0.40  | 0.68 | 0.57  | 0.40 | 0.48 | 0.51 |
| <i>Diaphorobacter</i>         | 0.00  | 0.00 | 0.01 | 0.00 | 0.06 | 0.21 | 0.03  | 0.00 | 0.00  | 0.06 | 0.00 | 0.05 |
| <i>Betaproteobacteria_u</i>   | 0.57  | 0.79 | 0.48 | 0.68 | 0.22 | 0.87 | 0.68  | 1.13 | 0.72  | 0.25 | 1.19 | 0.29 |
| <i>Myxococcales_u</i>         | 0.68  | 1.33 | 2.11 | 1.21 | 2.18 | 0.63 | 0.58  | 1.00 | 0.99  | 0.54 | 1.00 | 1.16 |
| <i>Deltaproteobacteria_u</i>  | 0.36  | 0.77 | 0.61 | 0.05 | 0.17 | 0.41 | 0.27  | 0.48 | 0.52  | 0.14 | 0.63 | 0.00 |
| <i>Chromatiales_u</i>         | 0.01  | 0.00 | 0.00 | 0.00 | 0.00 | 0.00 | 0.01  | 0.00 | 0.00  | 0.00 | 0.00 | 0.00 |
| <i>Pantoea</i>                | 0.00  | 0.00 | 0.00 | 0.00 | 0.00 | 0.00 | 3.52  | 0.03 | 0.00  | 0.00 | 0.00 | 0.00 |
| <i>Enterobacteriaceae_u</i>   | 0.04  | 0.00 | 0.02 | 0.33 | 1.03 | 1.64 | 0.15  | 0.03 | 0.00  | 0.31 | 0.00 | 8.09 |
| <i>Acinetobacter</i>          | 0.01  | 0.00 | 0.35 | 0.77 | 3.32 | 3.72 | 0.03  | 0.00 | 0.14  | 0.52 | 0.68 | 0.09 |
| <i>Enhydrobacter</i>          | 0.00  | 0.00 | 0.05 | 0.00 | 0.00 | 2.11 | 0.43  | 0.00 | 0.06  | 0.00 | 0.00 | 0.00 |
| <i>Pseudomonas</i>            | 0.07  | 0.03 | 0.17 | 0.07 | 0.38 | 0.68 | 0.16  | 0.46 | 0.23  | 0.25 | 0.39 | 2.32 |
| <i>Gammaproteobacteria_u</i>  | 3.52  | 1.67 | 1.93 | 1.75 | 1.36 | 3.14 | 2.25  | 2.16 | 1.31  | 4.52 | 2.22 | 3.23 |
| <i>Steroidobacter</i>         | 0.97  | 1.11 | 1.83 | 2.14 | 2.15 | 1.65 | 0.40  | 0.98 | 0.53  | 0.47 | 1.61 | 1.06 |
| <i>Lysobacter</i>             | 0.26  | 0.57 | 1.14 | 0.96 | 0.11 | 1.31 | 0.30  | 0.69 | 0.62  | 0.73 | 1.46 | 0.00 |
| <i>Thermomonas</i>            | 0.00  | 0.10 | 0.10 | 0.00 | 0.00 | 0.00 | 0.04  | 0.03 | 0.01  | 0.00 | 0.00 | 0.00 |

|                           |      |      |      |      |      |      |      |      |      |      |      |      |
|---------------------------|------|------|------|------|------|------|------|------|------|------|------|------|
| <i>Xanthomonadaceae_u</i> | 0.59 | 1.10 | 0.52 | 0.51 | 1.17 | 2.76 | 0.74 | 1.16 | 0.89 | 1.93 | 0.85 | 0.35 |
| <i>Proteobacteria_u</i>   | 1.70 | 1.19 | 1.50 | 1.29 | 0.95 | 1.63 | 1.05 | 1.75 | 1.12 | 0.97 | 1.13 | 0.55 |
| <i>Treponema</i>          | 0.00 | 0.00 | 0.00 | 0.00 | 0.05 | 0.00 | 0.00 | 0.00 | 0.00 | 0.00 | 0.00 | 0.00 |
| <i>Spartobacteria_u</i>   | 1.00 | 0.45 | 0.51 | 0.30 | 0.21 | 0.69 | 0.92 | 1.85 | 0.27 | 0.34 | 0.27 | 0.18 |

| soil W                        | unlabeled |         |         |         |         |         | <sup>13</sup> C-labelled |         |         |         |         |         |
|-------------------------------|-----------|---------|---------|---------|---------|---------|--------------------------|---------|---------|---------|---------|---------|
|                               | fract.11  | fract.9 | fract.7 | fract.5 | fract.3 | fract.1 | fract.11                 | fract.9 | fract.7 | fract.5 | fract.3 | fract.1 |
| Genus (1)                     |           |         |         |         |         |         |                          |         |         |         |         |         |
| <i>Gp1</i>                    | 1.00      | 1.20    | 0.76    | 1.30    | 0.75    | 0.90    | 1.75                     | 1.34    | 1.24    | 0.09    | 0.50    | 1.29    |
| <i>Gp3</i>                    | 2.48      | 3.11    | 2.35    | 3.51    | 3.55    | 3.17    | 3.15                     | 2.68    | 2.84    | 1.01    | 2.72    | 5.41    |
| <i>Gp4</i>                    | 4.13      | 1.03    | 0.97    | 2.54    | 1.70    | 2.32    | 3.00                     | 0.57    | 0.62    | 1.01    | 1.44    | 2.18    |
| <i>Gp5</i>                    | 1.18      | 0.66    | 0.52    | 1.01    | 0.90    | 0.52    | 1.28                     | 0.49    | 0.44    | 0.73    | 0.64    | 1.34    |
| <i>Gp6</i>                    | 1.72      | 4.36    | 2.87    | 3.36    | 3.08    | 3.77    | 1.73                     | 3.41    | 2.25    | 6.42    | 3.31    | 5.47    |
| <i>Gp7</i>                    | 0.21      | 0.99    | 0.98    | 0.69    | 0.97    | 0.42    | 0.33                     | 0.96    | 1.04    | 0.73    | 0.32    | 0.63    |
| <i>Gp10</i>                   | 0.02      | 0.03    | 0.03    | 0.05    | 0.00    | 0.00    | 0.02                     | 0.04    | 0.02    | 0.00    | 0.00    | 0.00    |
| <i>Gp16</i>                   | 0.63      | 5.81    | 5.12    | 3.29    | 2.75    | 2.24    | 0.61                     | 5.71    | 6.31    | 0.92    | 2.88    | 2.06    |
| <i>Gp17</i>                   | 0.27      | 1.48    | 1.64    | 0.79    | 0.55    | 1.20    | 0.24                     | 1.49    | 1.29    | 1.28    | 1.21    | 1.68    |
| <i>Gp22</i>                   | 0.28      | 0.94    | 0.86    | 0.69    | 0.57    | 1.50    | 0.19                     | 0.72    | 0.60    | 0.37    | 1.78    | 0.27    |
| <i>Ilumatobacter</i>          | 0.62      | 2.85    | 2.83    | 2.61    | 2.14    | 2.77    | 1.39                     | 3.69    | 4.02    | 1.93    | 1.01    | 2.79    |
| <i>Iamia</i>                  | 0.13      | 0.81    | 0.77    | 0.63    | 0.55    | 0.77    | 0.17                     | 0.70    | 0.53    | 0.28    | 0.80    | 1.55    |
| <i>Acidimicrobiales_u</i>     | 0.58      | 2.82    | 3.08    | 3.37    | 2.60    | 2.24    | 0.62                     | 3.64    | 3.84    | 2.94    | 4.11    | 1.72    |
| <i>Cellulomonas</i>           | 0.06      | 0.15    | 0.19    | 0.17    | 0.24    | 0.00    | 0.02                     | 0.15    | 0.29    | 0.00    | 0.00    | 0.00    |
| <i>Corynebacterium</i>        | 0.00      | 0.00    | 0.00    | 0.00    | 1.10    | 0.00    | 0.00                     | 0.00    | 0.00    | 0.00    | 0.00    | 0.69    |
| <i>Blastococcus</i>           | 0.01      | 0.11    | 0.07    | 0.06    | 0.07    | 0.07    | 0.02                     | 0.13    | 0.22    | 0.00    | 0.00    | 0.00    |
| <i>Intrasporangiaceae_u</i>   | 0.12      | 0.61    | 0.54    | 0.95    | 0.18    | 0.80    | 0.21                     | 0.72    | 0.71    | 0.55    | 0.00    | 0.47    |
| <i>Kineosporia</i>            | 0.13      | 0.35    | 0.46    | 0.59    | 0.64    | 0.52    | 0.21                     | 0.30    | 0.55    | 0.09    | 1.30    | 0.01    |
| <i>Agromyces</i>              | 0.00      | 0.18    | 0.21    | 0.30    | 0.24    | 0.27    | 0.02                     | 0.15    | 0.31    | 1.74    | 0.62    | 0.11    |
| <i>Microbacteriaceae_u</i>    | 0.22      | 0.71    | 0.66    | 0.89    | 0.84    | 0.95    | 0.14                     | 0.55    | 0.67    | 0.46    | 0.00    | 0.65    |
| <i>Arthrobacter</i>           | 0.16      | 0.53    | 0.31    | 0.59    | 0.88    | 1.32    | 0.23                     | 0.70    | 0.36    | 4.86    | 0.37    | 0.53    |
| <i>Micromonosporaceae_u</i>   | 0.76      | 2.41    | 4.07    | 5.49    | 2.71    | 3.14    | 0.62                     | 2.92    | 5.53    | 2.29    | 1.53    | 2.01    |
| <i>Virgisporangium</i>        | 0.01      | 0.00    | 0.00    | 0.00    | 0.00    | 0.00    | 0.00                     | 0.02    | 0.02    | 0.00    | 0.00    | 0.00    |
| <i>Mycobacterium</i>          | 0.42      | 1.10    | 1.13    | 2.15    | 1.50    | 0.77    | 0.45                     | 1.28    | 1.11    | 9.36    | 1.83    | 0.47    |
| <i>Humicoccus</i>             | 0.18      | 0.59    | 0.91    | 0.75    | 0.20    | 0.25    | 0.24                     | 0.68    | 0.98    | 0.09    | 0.78    | 0.40    |
| <i>Nocardiaceae_u</i>         | 0.06      | 0.40    | 0.42    | 1.17    | 0.84    | 0.50    | 0.09                     | 0.19    | 0.25    | 0.09    | 0.05    | 0.27    |
| <i>Nocardioides</i>           | 0.43      | 2.00    | 2.22    | 2.49    | 2.97    | 1.20    | 0.42                     | 1.36    | 1.76    | 0.92    | 2.35    | 0.94    |
| <i>Nocardioideaceae_u</i>     | 0.54      | 1.47    | 2.13    | 2.00    | 2.58    | 2.97    | 0.36                     | 1.51    | 1.91    | 1.74    | 0.71    | 2.03    |
| <i>Propionibacterium</i>      | 0.00      | 0.00    | 0.00    | 0.38    | 0.77    | 0.72    | 0.02                     | 0.00    | 0.15    | 0.55    | 0.39    | 0.88    |
| <i>Propionibacteriaceae_u</i> | 0.04      | 0.18    | 0.22    | 0.12    | 0.02    | 0.07    | 0.10                     | 0.26    | 0.22    | 0.83    | 0.00    | 1.33    |
| <i>Actinophytocola</i>        | 0.00      | 0.00    | 0.00    | 0.01    | 0.00    | 0.00    | 0.00                     | 0.00    | 0.00    | 0.00    | 0.00    | 0.00    |
| <i>Pseudonocardia</i>         | 0.00      | 0.06    | 0.18    | 0.09    | 0.00    | 0.00    | 0.03                     | 0.09    | 0.20    | 0.00    | 0.00    | 0.00    |
| <i>Pseudonocardiaceae_u</i>   | 0.04      | 0.13    | 0.21    | 0.05    | 0.62    | 0.25    | 0.02                     | 0.17    | 0.16    | 0.28    | 0.00    | 1.33    |
| <i>Streptomycetaceae_u</i>    | 0.17      | 0.52    | 0.57    | 1.34    | 1.32    | 0.40    | 0.19                     | 0.77    | 0.80    | 1.38    | 0.82    | 2.02    |
| <i>Streptosporangiaceae_u</i> | 0.00      | 0.00    | 0.03    | 0.00    | 0.02    | 0.00    | 0.00                     | 0.04    | 0.02    | 0.00    | 0.43    | 0.00    |
| <i>Actinomycetales_u</i>      | 0.50      | 2.79    | 4.08    | 2.99    | 3.19    | 2.54    | 0.76                     | 3.60    | 4.00    | 1.28    | 5.89    | 3.21    |
| <i>Rubrobacter</i>            | 0.00      | 0.00    | 0.00    | 0.00    | 0.00    | 0.00    | 0.00                     | 0.00    | 0.00    | 0.00    | 0.00    | 0.00    |
| <i>Solirubrobacterales_u</i>  | 0.31      | 1.93    | 3.20    | 2.30    | 1.56    | 1.75    | 0.29                     | 2.03    | 3.42    | 0.64    | 1.12    | 1.00    |
| <i>Actinobacteria_u</i>       | 1.84      | 11.17   | 12.39   | 8.75    | 8.94    | 8.43    | 1.85                     | 10.53   | 10.95   | 7.06    | 5.21    | 5.08    |
| <i>Dysgonomonas</i>           | 0.00      | 0.00    | 0.00    | 0.00    | 0.00    | 0.00    | 0.00                     | 0.00    | 0.00    | 0.00    | 0.00    | 0.00    |
| <i>Porphyromonas</i>          | 0.00      | 0.00    | 0.00    | 0.00    | 0.00    | 0.22    | 0.00                     | 0.00    | 0.00    | 0.00    | 0.53    | 0.00    |
| <i>Flavobacterium</i>         | 37.84     | 0.38    | 1.46    | 2.71    | 3.52    | 6.21    | 35.25                    | 0.32    | 0.95    | 1.83    | 2.70    | 3.93    |
| <i>Flavobacteriaceae_u</i>    | 0.69      | 0.01    | 0.12    | 0.09    | 0.44    | 0.27    | 0.68                     | 0.02    | 0.00    | 0.00    | 2.33    | 0.53    |
| <i>Adhaeribacter</i>          | 0.07      | 0.00    | 0.00    | 0.00    | 0.00    | 0.00    | 0.26                     | 0.00    | 0.00    | 0.18    | 0.07    | 0.00    |
| <i>Mucilaginibacter</i>       | 1.52      | 0.00    | 0.06    | 0.29    | 0.57    | 0.07    | 1.01                     | 0.00    | 0.13    | 0.00    | 0.00    | 0.00    |

|                              |       |      |      |      |      |      |      |      |      |      |       |      |
|------------------------------|-------|------|------|------|------|------|------|------|------|------|-------|------|
| <i>Pedobacter</i>            | 0.89  | 0.00 | 0.09 | 0.28 | 0.02 | 0.22 | 0.69 | 0.02 | 0.07 | 0.00 | 0.00  | 0.16 |
| <i>Sphingobacteriaceae_u</i> | 0.10  | 0.00 | 0.00 | 0.01 | 0.00 | 0.00 | 0.10 | 0.00 | 0.00 | 0.00 | 0.00  | 0.00 |
| <i>Sphingobacteriales_u</i>  | 0.08  | 0.00 | 0.01 | 0.00 | 0.00 | 0.02 | 0.07 | 0.00 | 0.02 | 0.00 | 0.00  | 0.05 |
| <i>Bacteroidetes_u</i>       | 12.35 | 0.20 | 0.51 | 1.39 | 1.78 | 4.01 | 8.58 | 0.17 | 0.33 | 0.00 | 0.94  | 1.80 |
| <i>Staphylococcus</i>        | 0.00  | 0.00 | 0.00 | 0.02 | 0.07 | 0.20 | 0.00 | 0.00 | 0.04 | 0.73 | 0.14  | 0.61 |
| <i>Gemmatimonas</i>          | 0.40  | 1.51 | 1.85 | 1.73 | 2.71 | 2.22 | 0.52 | 2.17 | 1.40 | 1.01 | 1.16  | 2.16 |
| <i>Nitrospira</i>            | 0.40  | 0.38 | 0.37 | 0.49 | 0.86 | 0.30 | 0.36 | 0.30 | 0.35 | 0.18 | 0.55  | 0.08 |
| <i>Hyphomicrobium</i>        | 0.08  | 0.10 | 0.18 | 0.32 | 0.04 | 0.42 | 0.10 | 0.09 | 0.18 | 0.09 | 0.00  | 1.12 |
| <i>Hyphomicrobiaceae_u</i>   | 0.13  | 0.53 | 0.40 | 0.50 | 0.33 | 0.57 | 0.35 | 0.60 | 0.55 | 0.73 | 0.00  | 0.05 |
| <i>Rhizobiales_u</i>         | 1.51  | 3.78 | 2.19 | 2.59 | 1.72 | 2.07 | 2.43 | 3.47 | 2.33 | 2.29 | 2.88  | 2.65 |
| <i>Alphaproteobacteria_u</i> | 0.34  | 0.75 | 0.60 | 0.61 | 0.24 | 0.60 | 0.49 | 1.32 | 0.69 | 0.09 | 0.32  | 1.39 |
| <i>Diaphorobacter</i>        | 0.00  | 0.00 | 0.00 | 0.00 | 0.02 | 0.00 | 0.00 | 0.00 | 0.04 | 0.00 | 0.02  | 0.01 |
| <i>Betaproteobacteria_u</i>  | 1.03  | 4.22 | 2.58 | 1.36 | 1.41 | 1.87 | 1.91 | 3.37 | 2.00 | 0.37 | 0.50  | 0.90 |
| <i>Myxococcales_u</i>        | 0.50  | 1.31 | 1.58 | 0.99 | 1.41 | 1.60 | 0.50 | 1.15 | 1.35 | 1.10 | 0.80  | 0.71 |
| <i>Deltaproteobacteria_u</i> | 0.95  | 0.71 | 0.79 | 0.72 | 0.68 | 0.75 | 1.13 | 0.81 | 1.18 | 1.01 | 1.05  | 1.19 |
| <i>Chromatiales_u</i>        | 0.01  | 0.07 | 0.13 | 0.00 | 0.02 | 0.00 | 0.03 | 0.06 | 0.04 | 0.00 | 0.00  | 1.47 |
| <i>Pantoea</i>               | 0.00  | 0.00 | 0.00 | 0.06 | 0.00 | 0.00 | 0.00 | 0.00 | 0.00 | 0.00 | 0.00  | 0.00 |
| <i>Enterobacteriaceae_u</i>  | 0.07  | 0.00 | 0.01 | 0.06 | 0.48 | 0.02 | 0.00 | 0.00 | 0.07 | 0.28 | 0.07  | 1.39 |
| <i>Acinetobacter</i>         | 0.10  | 0.00 | 0.00 | 0.06 | 0.04 | 0.00 | 0.10 | 0.00 | 0.29 | 0.00 | 10.14 | 0.39 |
| <i>Enhydrobacter</i>         | 0.00  | 0.00 | 0.00 | 0.00 | 0.15 | 0.00 | 0.00 | 0.00 | 0.00 | 0.00 | 1.05  | 0.00 |
| <i>Pseudomonas</i>           | 0.04  | 0.04 | 0.06 | 0.12 | 0.44 | 0.15 | 0.09 | 0.06 | 0.11 | 0.18 | 0.14  | 0.28 |
| <i>Gammaproteobacteria_u</i> | 1.55  | 2.43 | 2.23 | 2.66 | 3.99 | 3.39 | 2.34 | 2.30 | 2.27 | 4.68 | 3.47  | 5.76 |
| <i>Steroidobacter</i>        | 0.12  | 0.47 | 0.24 | 0.04 | 0.75 | 0.55 | 0.16 | 0.36 | 0.49 | 0.28 | 0.41  | 1.72 |
| <i>Lysobacter</i>            | 0.05  | 0.34 | 0.33 | 0.10 | 0.13 | 0.02 | 0.19 | 0.64 | 0.58 | 0.83 | 1.14  | 0.11 |
| <i>Thermomonas</i>           | 0.11  | 0.56 | 0.69 | 0.42 | 0.55 | 0.87 | 0.26 | 0.58 | 0.42 | 0.09 | 1.01  | 1.17 |
| <i>Xanthomonadaceae_u</i>    | 0.50  | 1.12 | 1.47 | 1.97 | 2.29 | 1.65 | 1.01 | 1.36 | 1.64 | 0.92 | 2.58  | 2.44 |
| <i>Proteobacteria_u</i>      | 0.79  | 1.70 | 0.83 | 0.64 | 0.75 | 1.05 | 1.07 | 1.70 | 1.09 | 0.92 | 1.55  | 1.24 |
| <i>Treponema</i>             | 0.00  | 0.00 | 0.00 | 0.00 | 0.00 | 0.00 | 0.00 | 0.00 | 0.00 | 0.00 | 0.00  | 0.00 |
| <i>Spartobacteria_u</i>      | 1.49  | 0.82 | 0.74 | 0.87 | 1.21 | 0.87 | 2.20 | 0.77 | 0.91 | 3.30 | 0.66  | 0.95 |

(1) Genus or highest phylogenetic level the sequences could be assigned to
